# Supplementary material
Source: Springer Nature journal article supplement (https://www.springermedizin.de/resource/supplementary/12955_2009_650_MOESM5_ESM.pdf/9560998)

(a)  $m_+ / m = 1, \mu_T - \mu_R = 0$ 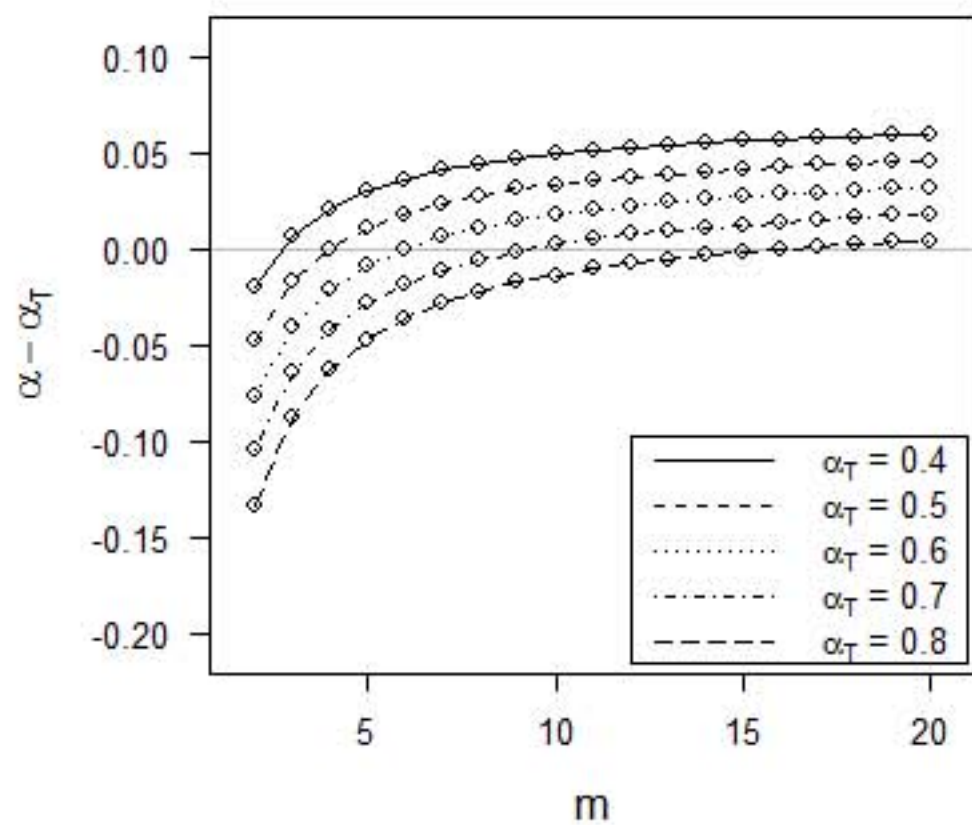(b)  $m_+ / m = 0.5, \mu_T - \mu_R = 0$ 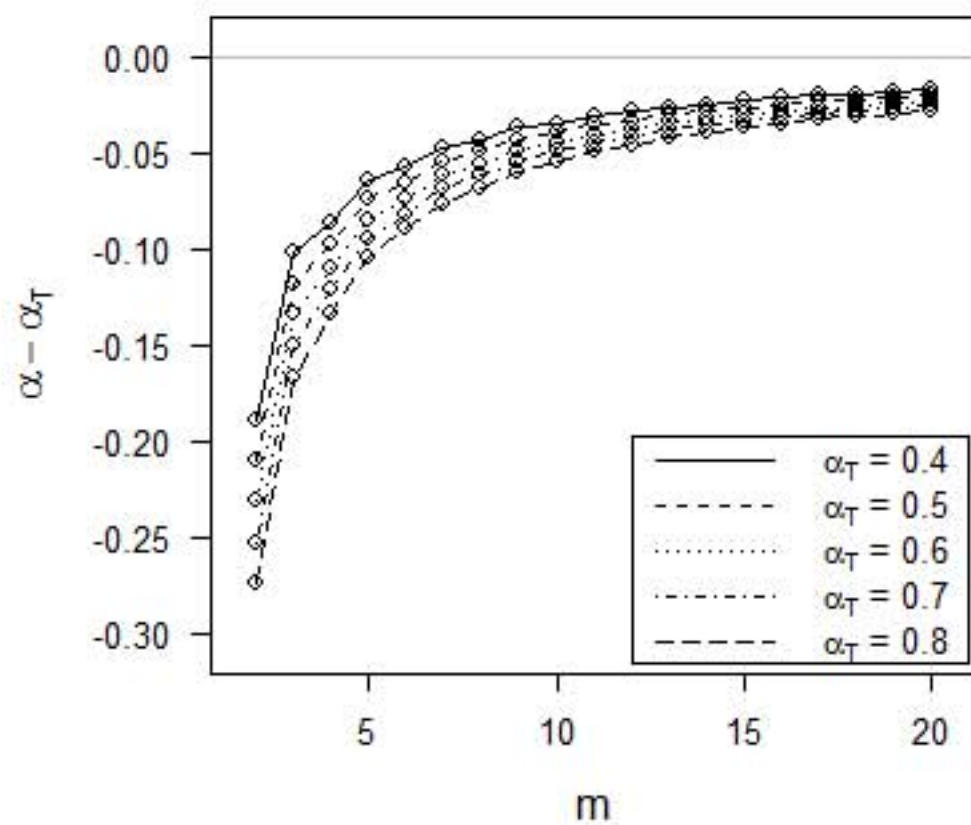(c)  $m_+ / m = 1, \mu_T - \mu_R = 1$ 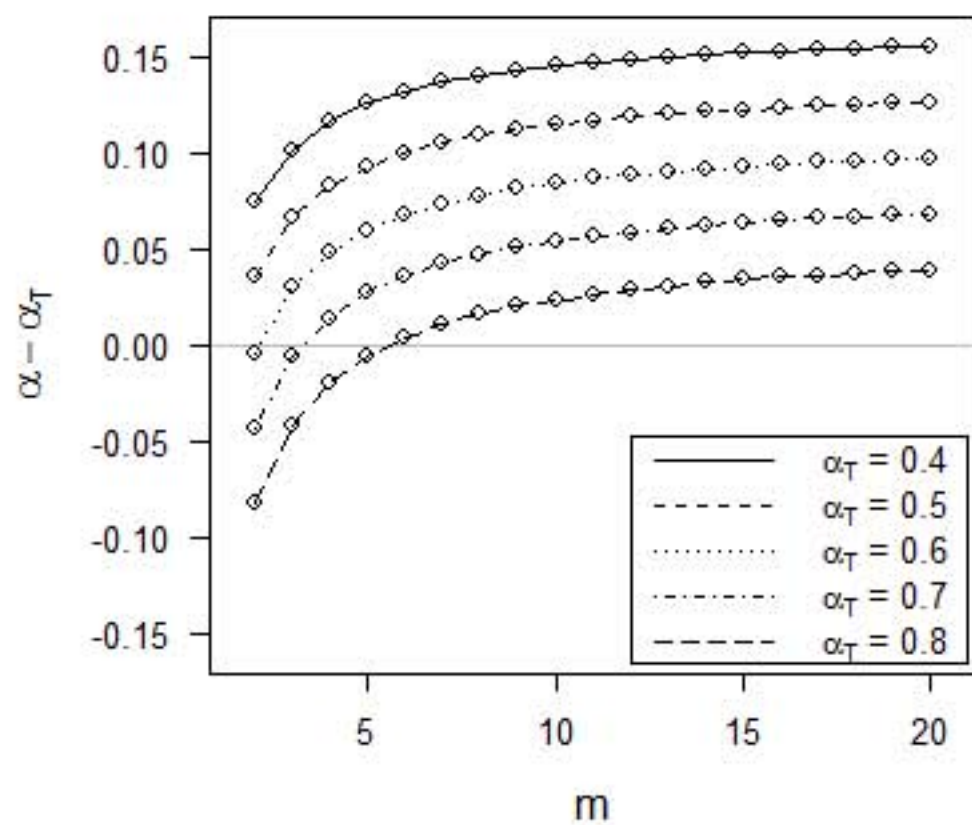(d)  $m_+ / m = 0.5, \mu_T - \mu_R = 1$ 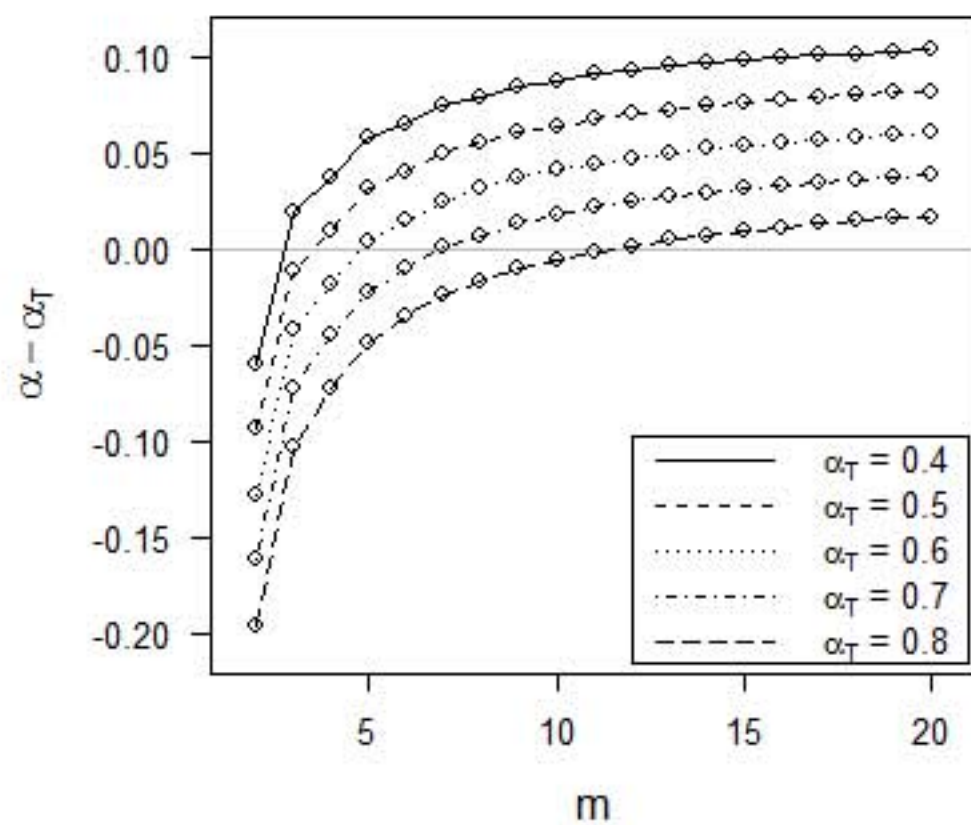

Supplement: MOESM5 [file 9560998]
